# Supplementary material for: Generation of biaxiality in smectic A phases by introduction of intermolecular perfluoroarene–arene and C–H/F interactions, and the non-odd–even effect of the molecules in their transition temperatures and layer distances
Source: Royal Society of Chemistry journal article supplement (doi:10.1039/c1sm05887h), 2011-01-01
Supplement: c1sm05887h.pdf [file c1sm05887h.pdf]

## Generation of biaxiality in smectic A phases by introduction of intermolecular perfluoroarene-arene and C-H/F interactions, and the non-odd-even effect of the molecules in their transition temperatures and layer distances

Keiki Kishikawa,\*<sup>a</sup> Takahiro Inoue,<sup>a</sup> Yoshiyuki Sasaki,<sup>a</sup> Sumihiro Aikyo,<sup>a</sup> Masahiro Takahashi<sup>a</sup> and Shigeo Kohmoto<sup>a</sup>

### Electronic Supplementary Information

**Table S1.** Layer distances of **1a-j** obtained by XRD

| compound  | <i>n</i> | <i>d</i> <sub>obsd</sub> (Å) <sup>a</sup> | <i>L</i> <sub>calcd</sub> (Å) <sup>b</sup> |
|-----------|----------|-------------------------------------------|--------------------------------------------|
| <b>1a</b> | 7        | 24.5                                      | 27.0                                       |
| <b>1b</b> | 8        | 26.9                                      | 28.2                                       |
| <b>1c</b> | 9        | 27.6                                      | 29.6                                       |
| <b>1d</b> | 10       | 27.8                                      | 30.6                                       |
| <b>1e</b> | 11       | 29.5                                      | 32.0                                       |
| <b>1f</b> | 12       | 30.8                                      | 33.1                                       |
| <b>1g</b> | 13       | 30.8                                      | 34.5                                       |
| <b>1h</b> | 14       | 32.2                                      | 35.6                                       |
| <b>1i</b> | 15       | 33.1                                      | 36.8                                       |
| <b>1j</b> | 16       | 32.0                                      | 38.1                                       |

<sup>a</sup> The layer distance obtained from *d*(100) in the XRD profile.

<sup>b</sup> The molecular length *L* calculated as the all *trans*-form by molecular modelling (Chem3D).
